# Supplementary material
Source: PubMed Central journal article supplement (PMC5479001)
Supplement: AEM.00574-17_zam999117908s1.pdf [file AEM.00574-17_zam999117908s1.pdf]

**Table S1 Specific activities of the putative  $\alpha$ -L-arabinofuranosidases in *Caldicellulosiruptor* species** All the reactions were performed in a standard assay condition (pH 6 and 70°C). ND: Non-Detectable

| Enzyme family | Substrates       |                  |                  |                 |                    |                    |                     |
|---------------|------------------|------------------|------------------|-----------------|--------------------|--------------------|---------------------|
|               | <i>p</i> NP-AraF | <i>p</i> NP-XylP | <i>p</i> NP-GluP | Beechwood xylan | Wheat arabinoxylan | Sugarbeet arabinan | Debranched arabinan |
| <b>GH3-1</b>  | 0.13 ± 0.036     | 0.17 ± 0.0098    | 4.60 ± 0.11      | ND              | N.D.               | ND                 | ND                  |
| <b>GH3-2</b>  | 0.26 ± 0.017     | 0.25 ± 0.0090    | 3.65 ± 0.19      | ND              | ND                 | ND                 | ND                  |
| <b>GH43-1</b> | ND               | ND               | ND               | ND              | ND                 | ND                 | ND                  |
| <b>GH43-2</b> | ND               | ND               | ND               | ND              | ND                 | ND                 | ND                  |
| <b>GH43-3</b> | ND               | ND               | ND               | ND              | ND                 | ND                 | ND                  |
| <b>GH43-4</b> | ND               | ND               | ND               | ND              | ND                 | ND                 | ND                  |
| <b>GH43-5</b> | ND               | ND               | ND               | 5.21 ± 0.0234   | 4.38 ± 0.095       | ND                 | ND                  |
| <b>XynF</b>   | 5.08 ± 0.065     | ND               | ND               | ND              | 26.49 ± 1.10       | 3.44 ± 0.08        | 1.21 ± 0.056        |
| <b>AbF51</b>  | 321.06 ± 5.83    | ND               | ND               | ND              | ND                 | 4.64 ± 0.12        | 1.82 ± 0.094        |

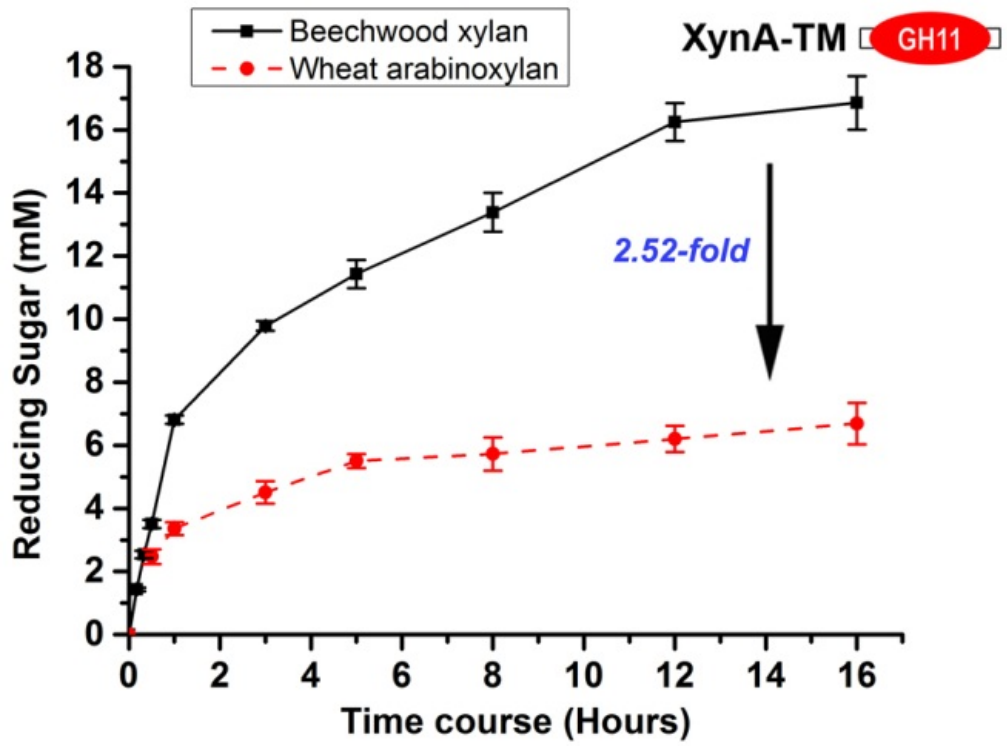

**Fig. S1** Time course of reducing sugars released from beechwood xylan and wheat arabinoxylan by a truncated mutant XynA-TM.

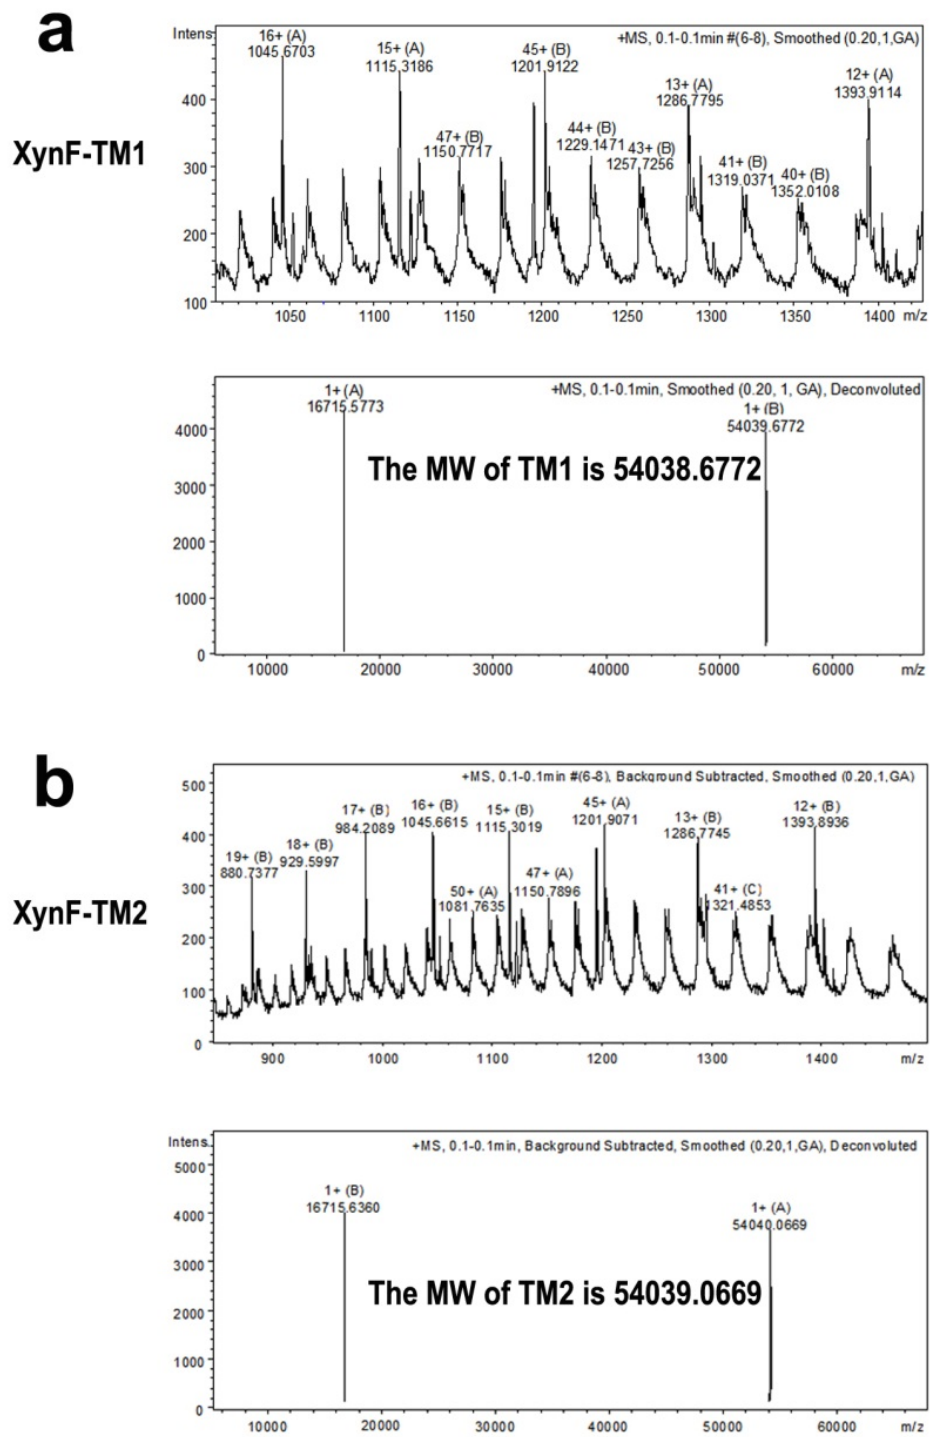

**Fig. S2** High resolution mass spectroscopy (HRMS) of two truncated mutants of XynF.

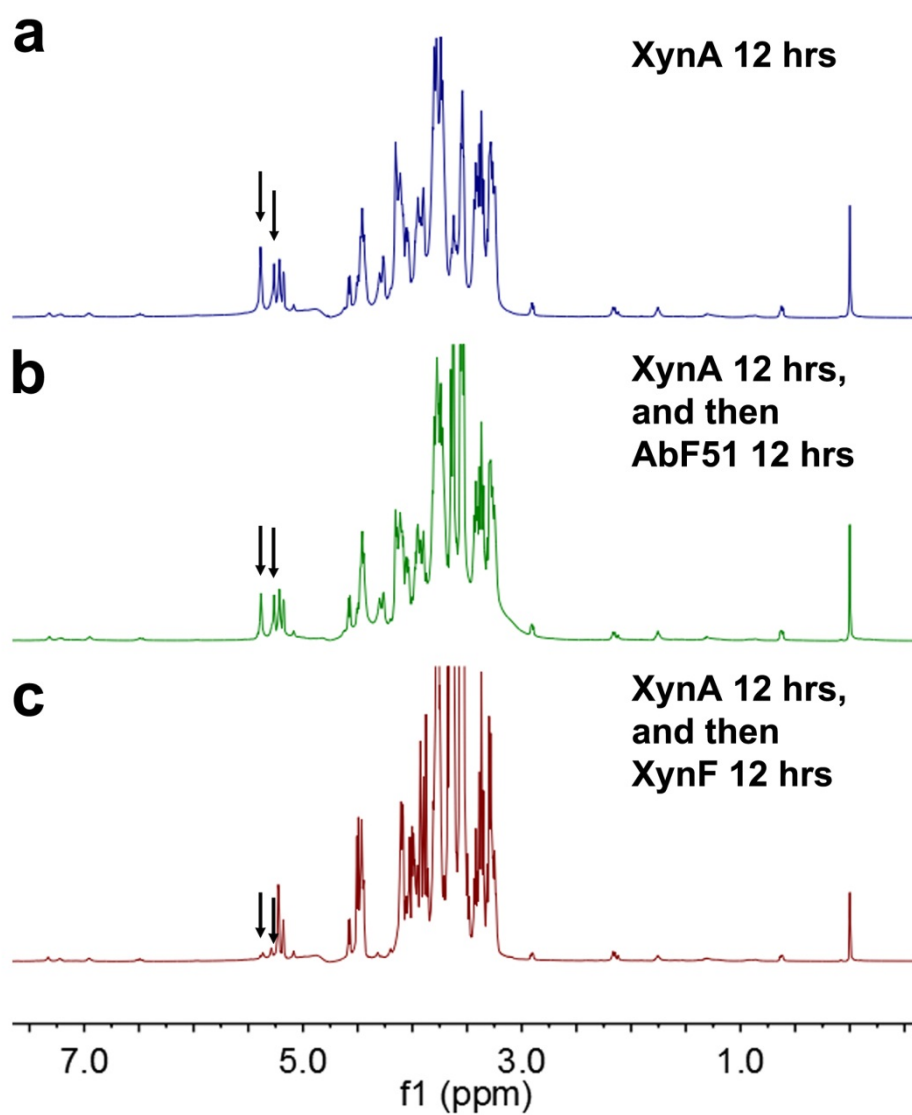

**Fig. S3**  $^1\text{H}$ -NMR analysis of hydrolysis products of WAX by XynA for 12 h (**a**); by XynA for 12 h, and followed by AbF51 for 12 h (**b**); by XynA for 12 h, and followed by XynF for 12 h (**c**). The signals of 2-O-linked ( $\delta$  5.28) and 3-O-linked ( $\delta$  5.33) arabinoses were assigned.
